# Supplementary material
Source: publisher figshare collection journal article supplement (https://tandf.figshare.com/ndownloader/files/22475954)
Supplement: Supplementary file 1 [file 22475954]

**Title**: **Prevalence, Awareness, Treatment and Control of Hypertension in various ethnic groups (Hui, Kazakh, Kyrgyz, Mongolian, Tajik) in Xinjiang, Northwest China**

**Authors:** Mulalibieke Heizhati*, Lin Wang*, Xiaoguang Yao, Mei Li, Jing Hong, Qin Luo, Delian Zhang, Suofeiya Abulikemu, Ting Wu, Nanfang Li.

*These authors equally contributed to this work.

Affiliation:

National Health Committee Key Laboratory of Hypertension Clinical Research; Hypertension Institute of Xinjiang; Hypertension Center of People's Hospital of Xinjiang Uygur Autonomous Region China.

No. 91 Tianchi Road, Urumqi 830001, Xinjiang, China.

Corresponding author:

Nanfang Li PhD

National Health Committee Key Laboratory of Hypertension Clinical Research; Hypertension Institute of Xinjiang; Hypertension Center of People's Hospital of Xinjiang Uygur Autonomous Region China.

No. 91 Tianchi Road, Urumqi 830001, Xinjiang, China
e-mail: [lnanfang2016@sina.com](mailto:lnanfang2010@sina.com)

Tel/Fax: +86 0991 8564818

| Supplementary Table 1. Characteristics of study population ≥18 years by region and gender | | | | | | | |
| --- | --- | --- | --- | --- | --- | --- | --- |
| Characteristics | Total  N=6807 | Region | | | Gender | | |
| Urban (n=1389, 20.4%) | Rural (n=5418, 79.6%) | P | Men (n=3267, 48.0%) | Women (n=3540, 52.0%) | P |
| Age (years) | 45.42±16.78 | 44.35±18.54 | 45.70±16.30 | 0.007 | 45.17±17.09 | 45.65±16.50 | 0.237 |
| Age groups 18-24 (n,%) | 730 (10.7) | 195 (14.1) | 535 (9.9) |  | 380 (11.6) | 350 (9.9) |  |
| 25-34 | 1310 (19.2) | 338 (24.4) | 972 (17.9) |  | 634 (19.4) | 676 (19.1) |  |
| 35-44 | 1507 (22.1) | 256 (18.4) | 1251 (23.0) |  | 714 (22.0) | 793 (22.4) |  |
| 45-54 | 1310 (19.2) | 206 (14.8) | 1104 (20.4) |  | 600 (18.3) | 710 (20.0) |  |
| 55-64 | 898 (13.2) | 145 (10.4) | 753 (13.9) |  | 431 (13.2) | 467 (13.2) |  |
| ≥65 | 1052 (15.5) | 249 (20.0) | 803 (14.8) |  | 508 (15.5) | 544 (15.4) |  |
| Ethnicity Han (n,%) | 2709 (39.8) | 788 (56.7) | 1921 (35.4) | <0.001 | 1382 (42.3) | 1327 (37.5) | <0.001 |
| Kazakh | 850 (12.5) | 67 (4.8) | 783 (14.5) |  | 334 (10.2) | 516 (14.6) |  |
| Uygur | 211 (3.1) | 158 (11.4) | 53 (0.98) |  | 90 (2.7) | 121 (3.4) |  |
| Mongolian | 769 (11.3) | 17 (1.2) | 752 (13.9) |  | 352 (10.8) | 417 (11.8) |  |
| Hui | 456 (6.7) | 49 (3.5) | 407 (7.5) |  | 201 (6.1) | 255 (7.2) |  |
| Kyrgyz | 1016 (14.9) | 242 (17.5) | 774 (14.3) |  | 514 (15.7) | 502 (14.2) |  |
| Tajik | 796 (11.7) | 68 (4.9) | 728 (13.4) |  | 394 (12.2) | 402 (11.3) |  |
| Education status ≤Primary (n, %) | 3206 (47.1) | 260 (18.7) | 2946 (54.4) | <0.001 | 1401 (42.8) | 1805 (51.0) | <0.001 |
| Junior high | 1824 (26.8) | 289 (20.8) | 1535 (28.3) |  | 942 (28.9) | 882 (24.9) |  |
| ≥Senior high | 1777 (26.1) | 840 (60.5) | 937 (17.3) |  | 924 (28.3) | 853 (24.1) |  |
| Body mass index (kg/m2) | 24.61±4.29 | 24.55±4.22 | 24.62±4.31 | 0.576 | 24.63±4.31 | 24.58±4.26 | 0.629 |
| <23.9kg/m2 | 3179 (46.7) | 663 (47.7) | 2516 (46.4) | 0.636 | 1519 (46.5) | 1660 (46.9) | 0.875 |
| 24.0-27.9kg/m2 | 2219 (32.6) | 447 (32.2) | 1772 (32.7) |  | 1065 (32.6) | 1154 (32.6) |  |
| ≥28.0kg/m2 | 1409 (20.7) | 279 (20.1) | 1130 (20.9) |  | 683 (20.9) | 726 (20.5) |  |
| Waist circumference (cm) | 83.76±12.86 | 83.50±12.56 | 83.83±12.94 | 0.379 | 83.82±12.94 | 83.71±12.79 | 0.738 |
| Abdominal obesity (n,%) | 2865 (39.5) | 540 (39.0) | 2182 (40.5) | 0.311 | 1100 (33.7) | 1623 (46.1) | <0.001 |
| Current cigarette consumption | 1610 (23.7) | 352 (25.4) | 1257 (23.5) | 0.247 | 1548 (44.0) | 119 (3.2) | <0.001 |
| Current alcohol intake (n, %) | 1454 (21.4) | 325 (23.4) | 1128 (21.1) | 0.160 | 1203 (37.1) | 251 (7.2) | <0.001 |
| Systolic BP (mmHg) | 124.55±18.94 | 124.48±18.95 | 124.56±18.93 | 0.877 | 124.59±18.92 | 124.51±18.95 | 0.865 |
| Diastolic BP (mmHg) | 74.04±11.36 | 74.14±11.45 | 74.01±11.34 | 0.698 | 73.99±11.20 | 74.08±11.52 | 0.731 |
| BP: blood pressure | | | | | | | |

| Supplementary Table 2. Crude prevalence of hypertension by age, gender and region (N=6807, n,%) | | | | | | | | | | |
| --- | --- | --- | --- | --- | --- | --- | --- | --- | --- | --- |
|  | Men | | Women | | Urban | | Rural | | Total | |
| Age | P1 | P2 | P1 | P2 | P1 | P2 | P1 | P2 | P1 | P2 |
| 18-24 | 127 (33.4) | 95 (17.1) | 110 (31.4) | 66 (18.9) | 72 (36.9) | 42 (21.5) | 165 (30.8) | 89 (16.6) | 237 (32.5) | 131 (17.9) |
| 25-34 | 186 (29.3) | 108 (17.0) | 183 (27.1) | 98 (14.5) | 105 (31.1) | 56 (16.6) | 263 (27.1) | 149 (15.4) | 369 (28.2) | 206 (15.7) |
| 35-44 | 238 (33.1) | 141 (19.6) | 252 (32.0) | 144 (18.3) | 78 (30.5) | 44 (17.2) | 412 (32.9) | 241 (19.3) | 490 (32.5) | 285 (18.9) |
| 45-54 | 234 (39.0) | 142 (23.7) | 288 (40.6) | 180 (25.4) | 72 (35.0) | 43 (20.9) | 449 (40.7) | 278 (25.2) | 522 (39.8) | 322 (24.6) |
| 55-64 | 209 (48.5) | 129 (29.9) | 214 (45.8) | 138 (29.6) | 62 (43.1) | 38 (26.4) | 361 (47.9) | 229 (30.4) | 423 (47.1) | 267 (29.7) |
| ≥65 | 251 (49.4) | 157 (30.9) | 314 (57.7) | 173 (31.8) | 149 (59.8) | 76 (30.5) | 416 (51.8) | 254 (31.6) | 565 (38.3) | 330 (31.4) |
| Total | 1245 (38.0) | 742 (22.7) | 1361 (38.5) | 799 (22.6) | 538 (38.8) | 299 (21.5) | 2066 (38.2) | 1240 (22.9) | 2606 (38.3) | 1541 (22.6) |
| P1: prevalence of hypertension based on 2017 American guideline; P2: prevalence of hypertension based on BP≥140/90mmHg. | | | | | | | | | | |

| Supplementary Table 3. Blood pressure level in each characteristics by its mean with 95% confidence interval (mmHg) | | | | | |
| --- | --- | --- | --- | --- | --- |
| Characteristics | Systolic BP (95%CI) | Diastolic BP (95%CI) | Characteristics | Systolic BP (95%CI) | Diastolic BP (95%CI) |
| Overall | 125.13 (124.67-125.58) | 74.58 (74.31-74.85) | Region |  |  |
| Age (years) |  |  | Rural | 125.46 (124.95-125.97) | 74.90 (74.60-75.20) |
| 18-24 | 114.74 (113.96-115.53) | 67.43 (66.83-68.02) | Urban | 123.85 (122.87-124.83) | 73.34 (72.76-73.92) |
| 25-34 | 115.84 (115.23-116.45) | 70.05 (69.57-70.53) | P | 0.008 | <0.001 |
| 35-44 | 119.98 (119.27-120.69) | 74.40 (73.87-74.91) | Cigarette consumption |  |  |
| 45-54 | 128.17 (127.17-129.17) | 78.87 (78.26-79.49) | current | 124.44 (123.62-125.26) | 75.16 (74.61-75.71) |
| 55-64 | 133.62 (132.25-135.00) | 79.04 (78.28-79.81) | past | 130.45 (128.69-132.22) | 77.82 (76.75-78.88) |
| ≥65 | 140.22 (138.86-141.60) | 76.29 (75.59-76.99) | never | 124.87 (124.31-125.43) | 74.08 (73.76-74.40) |
| P | <0.001 | <0.001 | P | <0.001 | <0.001 |
| Gender |  |  | Alcohol intake |  |  |
| Men | 126.18 (125.58-126.77) | 75.89 (75.50-76.27) | Yes | 127.20 (125.75-128.65) | 78.83 (77.82-79.82) |
| Women | 124.15 (123.48-124.83) | 73.37 (73.00-73.73) | No | 124.97 (124.49-125.44) | 74.26 (73.98-74.53) |
| P | <0.001 | <0.001 | P | <0.001 | <0.001 |
| Education |  |  | Body mass index (kg/m2) |  |  |
| ≤Primary | 129.31 (128.59-130.03) | 76.25 (75.85-76.65) | ≤23.9 | 118.73 (118.14-119.33) | 70.65 (70.29-71.01) |
| Junior high | 123.79 (122.96-124.62) | 74.39 (73.87-74.91) | 24-27.9 | 127.13 (126.38-127.87) | 76.16 (75.73-76.59) |
| ≥senior high | 118.96 (118.28-119.64) | 71.77 (71.31-72.24) | ≥28 | 135.32 (134.30-136.34) | 80.36 (79.77-80.95) |
| P | <0.001 | <0.001 | P | <0.001 | <0.001 |
| BP: blood pressure; 95%CI: 95% confidence interval. | | | | | |

| Supplementary table 4. Characteristics of Hypertensive patients with and with no medication information | | | |
| --- | --- | --- | --- |
| Characteristics | With (n=407) | With no (n=273) | P |
| Mean age (years) | 62.41 (61.16-63.66) | 61.76 (60.41-63.12) | 0.388 |
| Education (n,%) |  |  |  |
| ≤Primary | 209 (58.9) | 252 (77.5) | <0.001 |
| Junior high | 85 (23.9) | 52 (38.0) |
| ≥Senior high | 61 (17.2) | 21 (6.5) |
| Current smokers (n,%) | 57 (16.1) | 59 (18.2) | 0.317 |
| Drinkers (n,%) | 26 (7.3) | 19 (42.2) | 0.537 |
| BMI | 27.30 (26.88-27.72) | 27.79 (27.28-28.30) | 0.323 |
| BMI distribution (n,%) |  |  |  |
| <24kg/m2 | 65 (18.7) | 60 (18.5) | 0.272 |
| 24-27.9kg/m2 | 146 (42.0) | 118 (44.7) |
| ≥28kg/m2 | 137 (39.4) | 146 (45.1) |
| SBP (mmHg) | 151.84 (149.61-154.07) | 149.43 (147.11-151.74) | 0.270 |
| DBP (mmHg) | 85.08 (83.72-86.44) | 85.80 (84.37-87.23) | 0.637 |
| Ethnicity |  |  |  |
| Han | 222 (62.5) | 117 (36.0) | <0.001 |
| Non-Han | 133 (37.5) | 208 (64.0) |
| Region |  |  |  |
| Rural | 238 (67.0) | 294 (90.5) | <0.001 |
| Urban | 117 (33.0) | 31 (9.5) |
| Gender |  |  |  |
| Men | 139 (39.2) | 153 (47.1) | 0.044 |
| Women | 216 (60.8) | 172 (52.9) |
